# Supplementary material for: D1-Like and D2-Like Dopamine Receptors in the Rat Prefrontal Cortex: Impacts of Genetic Generalized Epilepsies and Social Behavioral Deficits
Source: MDPI journal article supplement (doi:10.3390/receptors3010004), 2024-02-20
Supplement: s1 [file s1]

Table S1A. *ANTERIOR CINGULATE / MEDIAL PREFRONTAL*

D1DR, LEVEL 1

| REGION   | STRAIN      | MEAN      | SEM | main effect        |
|----------|-------------|-----------|-----|--------------------|
| A24b/Cg1 | Wistar      | 1,3 ± 0,3 |     |                    |
|          | WAG/Rij     | 0,7 ± 0,2 |     | epilepsy p=0,03    |
|          | WAG/Rij-AGS | 0,8 ± 0,2 |     | (reduction by 34%) |
|          | KM          | 0,9 ± 0,2 |     |                    |
| A24a/PL  | Wistar      | 1,4 ± 0,4 |     |                    |
|          | WAG/Rij     | 1,1 ± 0,2 |     | AbS p=0,04         |
|          | WAG/Rij-AGS | 0,7 ± 0,2 |     | (reduction by 34%) |
|          | KM          | 1,2 ± 0,3 |     |                    |
| A25/IL   | Wistar      | 1,5 ± 0,4 |     |                    |
|          | WAG/Rij     | 1,1 ± 0,3 |     | epilepsy p=0,03    |
|          | WAG/Rij-AGS | 0,9 ± 0,2 |     | (reduction by 32%) |
|          | KM          | 1,0 ± 0,2 |     |                    |
| DP       | Wistar      | 1,3 ± 0,4 |     |                    |
|          | WAG/Rij     | 0,6 ± 0,1 |     |                    |
|          | WAG/Rij-AGS | 1,0 ± 0,2 |     |                    |
|          | KM          | 1,0 ± 0,3 |     |                    |

Table S1B. *INSULAR / LATERAL PREFRONTAL*

D1DR, LEVEL 1

| REGION | STRAIN      | MEAN      | SEM | main effect                         |
|--------|-------------|-----------|-----|-------------------------------------|
| GI     | Wistar      | 0,9 ± 0,2 |     |                                     |
|        | WAG/Rij     | 1,2 ± 0,4 |     |                                     |
|        | WAG/Rij-AGS | 1,2 ± 0,3 |     |                                     |
|        | KM          | 0,7 ± 0,3 |     |                                     |
| DI     | Wistar      | 2,5 ± 0,6 |     |                                     |
|        | WAG/Rij     | 2,8 ± 0,7 |     |                                     |
|        | WAG/Rij-AGS | 2,6 ± 0,8 |     |                                     |
|        | KM          | 1,6 ± 0,4 |     | "AUT" p=0,02<br>(reduction by 45%)  |
| AID    | Wistar      | 2,0 ± 0,5 |     |                                     |
|        | WAG/Rij     | 2,3 ± 0,6 |     |                                     |
|        | WAG/Rij-AGS | 1,7 ± 0,4 |     | AGS p=0,03                          |
|        | KM          | 1,3 ± 0,3 |     | (reduction by 29%)                  |
| AIV    | Wistar      | 2,6 ± 0,7 |     |                                     |
|        | WAG/Rij     | 2,1 ± 0,5 |     |                                     |
|        | WAG/Rij-AGS | 1,9 ± 0,4 |     | AGS p=0,04                          |
|        | KM          | 1,3 ± 0,3 |     | (reduction by 39%)                  |
| CLAU   | Wistar      | 4,7 ± 1,0 |     |                                     |
|        | WAG/Rij     | 4,7 ± 1,1 |     |                                     |
|        | WAG/Rij-AGS | 4,7 ± 1,1 |     |                                     |
|        | KM          | 3,8 ± 0,9 |     | "AUT" p=0,007<br>(reduction by 17%) |
| PIR    | Wistar      | 1,5 ± 0,4 |     |                                     |
|        | WAG/Rij     | 1,4 ± 0,3 |     |                                     |
|        | WAG/Rij-AGS | 1,5 ± 0,4 |     |                                     |
|        | KM          | 0,8 ± 0,2 |     | "AUT" p=0,008<br>(reduction by 68%) |

**Table S1C ANTERIOR CINGULATE / MEDIAL PREFRONTAL**

**D1DR, LEVEL 2**

| REGION   | STRAIN      | MEAN | SEM   | main effect        |
|----------|-------------|------|-------|--------------------|
| A24a/Cg2 | Wistar      | 1,52 | ± 0,6 |                    |
|          | WAG/Rij     | 0,63 | ± 0,2 | epilepsy p=0,001   |
|          | WAG/Rij-AGS | 0,36 | ± 0,0 | (reduction by 52%) |
|          | KM          | 0,61 | ± 0,3 |                    |
| A24b/Cg1 | Wistar      | 0,85 | ± 0,3 |                    |
|          | WAG/Rij     | 0,51 | ± 0,2 | epilepsy p=0,04    |
|          | WAG/Rij-AGS | 0,55 | ± 0,1 | (reduction by 52%) |
|          | KM          | 0,19 | ± 0,1 |                    |

**Table S1D. INSULAR / LATERAL PREFRONTAL**

**D1DR, LEVEL 2**

| REGION | STRAIN      | MEAN | SEM   | main effect                        |
|--------|-------------|------|-------|------------------------------------|
| GI     | Wistar      | 1,9  | ± 0,6 |                                    |
|        | WAG/Rij     | 1,4  | ± 0,4 |                                    |
|        | WAG/Rij-AGS | 1,8  | ± 0,6 |                                    |
|        | KM          | 1,6  | ± 0,6 |                                    |
| DI     | Wistar      | 2,5  | ± 0,6 |                                    |
|        | WAG/Rij     | 2,8  | ± 0,7 |                                    |
|        | WAG/Rij-AGS | 3,1  | ± 0,8 |                                    |
|        | KM          | 2,3  | ± 0,6 |                                    |
| AID    | Wistar      | 2,3  | ± 0,6 |                                    |
|        | WAG/Rij     | 1,7  | ± 0,4 |                                    |
|        | WAG/Rij-AGS | 2,2  | ± 0,6 |                                    |
|        | KM          | 2,0  | ± 0,6 |                                    |
| AIV    | Wistar      | 2,5  | ± 0,5 |                                    |
|        | WAG/Rij     | 2,1  | ± 0,5 |                                    |
|        | WAG/Rij-AGS | 2,3  | ± 0,6 |                                    |
|        | KM          | 2,1  | ± 0,6 |                                    |
| CLAU   | Wistar      | 5,0  | ± 1,1 |                                    |
|        | WAG/Rij     | 4,8  | ± 1,0 |                                    |
|        | WAG/Rij-AGS | 5,4  | ± 1,3 |                                    |
|        | KM          | 4,5  | ± 1,1 | "AUT" p=0,01<br>(reduction by 15%) |
| PIR    | Wistar      | 2,3  | ± 0,6 |                                    |
|        | WAG/Rij     | 2,5  | ± 0,6 |                                    |
|        | WAG/Rij-AGS | 2,4  | ± 0,6 |                                    |
|        | KM          | 1,4  | ± 0,4 | "AUT" p=0,01<br>(reduction by 30%) |

**Table S1E** *ANTERIOR CINGULATE / MEDIAL PREFRONTAL*

**D1DR, LEVEL 3**

| REGION              | STRAIN             | MEAN      | SEM |
|---------------------|--------------------|-----------|-----|
| <b>A24b'/mCing1</b> | <b>Wistar</b>      | 1,4 ± 0,3 |     |
|                     | <b>WAG/Rij</b>     | 0,7 ± 0,3 |     |
|                     | <b>WAG/Rij-AGS</b> | 1,0 ± 0,3 |     |
|                     | <b>KM</b>          | 0,3 ± 0,1 |     |
| <b>A24a'/mCing2</b> | <b>Wistar</b>      | 0,5 ± 0,1 |     |
|                     | <b>WAG/Rij</b>     | 0,7 ± 0,2 |     |
|                     | <b>WAG/Rij-AGS</b> | 0,9 ± 0,2 |     |
|                     | <b>KM</b>          | 0,2 ± 0,1 |     |
| <b>A33/area 33</b>  | <b>Wistar</b>      | 0,4 ± 0,2 |     |
|                     | <b>WAG/Rij</b>     | 0,8 ± 0,3 |     |
|                     | <b>WAG/Rij-AGS</b> | 0,5 ± 0,2 |     |
|                     | <b>KM</b>          | 0,2 ± 0,1 |     |

**Table S1F. INSULAR / LATERAL PREFRONTAL**

**D1DR, LEVEL 2**

| REGION     | STRAIN             | MEAN      | SEM | main effect |
|------------|--------------------|-----------|-----|-------------|
| <b>DI</b>  | <b>Wistar</b>      | 3,1 ± 0,5 |     |             |
| <b>DI</b>  | <b>WAG/Rij</b>     | 3,6 ± 0,6 |     |             |
| <b>DI</b>  | <b>WAG/Rij-AGS</b> | 3,4 ± 0,5 |     |             |
| <b>DI</b>  | <b>KM</b>          | 3,2 ± 0,5 |     |             |
| <b>GI</b>  | <b>Wistar</b>      | 2,1 ± 0,5 |     |             |
| <b>GI</b>  | <b>WAG/Rij</b>     | 2,7 ± 0,5 |     |             |
| <b>GI</b>  | <b>WAG/Rij-AGS</b> | 2,3 ± 0,4 |     |             |
| <b>GI</b>  | <b>KM</b>          | 1,8 ± 0,6 |     |             |
| <b>AIP</b> | <b>Wistar</b>      | 3,0 ± 0,6 |     |             |
| <b>AIP</b> | <b>WAG/Rij</b>     | 2,9 ± 0,4 |     |             |
| <b>AIP</b> | <b>WAG/Rij-AGS</b> | 2,8 ± 0,4 |     |             |
| <b>AIP</b> | <b>KM</b>          | 2,4 ± 0,4 |     |             |

D1 dopamine receptors' regional binding densities in the prefrontal cortical and adjacent regions in the rat groups studied  
 S2A,S2B - anatomical level I (AP+2,4±2,5) ; S2C,S2D - anatomical level II (AP:+0,17±0,19); S2E,S2F -anatomical level III (AP:-0,26±0,33)

The values are given as mean ± SEM, in pmol/g of tissue.

The main effects (according to ANOVA GLM) and the corresponded p-levels (at the left) and the percentages of changes (below) are given

**Abbreviations used:**

**Cg1/A24b and Cg2/A24a: the primary and secondary cingulate cortex, correspondingly**

**mCing1/A24b' and mCing2/A24a' : the primary and secondary midcingulate cortex, correspondingly**

**IL, PL: the infra- and pre-limbic cortex, correspondingly**

**AID,AIV,AIP - the agranular insular cortex (dorsal, ventral and posterior divisions, correspondingly)**

**GI,DI: the granular and dysgranular insular cortex, correspondingly**

**CLAU: the claustrum**

**PIR: the piriform cortex**
