# Supplementary material for: D1-Like and D2-Like Dopamine Receptors in the Rat Prefrontal Cortex: Impacts of Genetic Generalized Epilepsies and Social Behavioral Deficits
Source: MDPI journal article supplement (doi:10.3390/receptors3010004), 2024-02-20
Supplement: s1 [file s1]

| Table S2A. <i>ANTERIOR CINGULATE / MEDIAL PREFRONTAL</i> |             |           |     |                    |
|----------------------------------------------------------|-------------|-----------|-----|--------------------|
| D2DR, LEVEL 1                                            |             |           |     |                    |
| REGION                                                   | STRAIN      | MEAN      | SEM | main effect        |
| A24b/Cg1                                                 | Wistar      | 7,5 ± 0,7 |     |                    |
|                                                          | WAG/Rij     | 3,8 ± 0,3 |     | epilepsy p=0,001   |
|                                                          | WAG/Rij-AGS | 3,3 ± 0,2 |     | (decreased by 51%) |
|                                                          | KM          | 3,8 ± 0,4 |     |                    |
| A24a/PL                                                  | Wistar      | 7,2 ± 0,7 |     |                    |
|                                                          | WAG/Rij     | 3,9 ± 0,2 |     | epilepsy p=0,002   |
|                                                          | WAG/Rij-AGS | 3,7 ± 0,5 |     | (decreased by 43%) |
|                                                          | KM          | 4,8 ± 0,5 |     |                    |
| A25/IL                                                   | Wistar      | 6,2 ± 0,6 |     |                    |
|                                                          | WAG/Rij     | 2,5 ± 0,4 |     | epilepsy p=0,001   |
|                                                          | WAG/Rij-AGS | 2,7 ± 0,4 |     | (decreased by 58%) |
|                                                          | KM          | 2,9 ± 0,7 |     |                    |
| DP                                                       | Wistar      | 3,8 ± 0,7 |     |                    |
|                                                          | WAG/Rij     | 1,1 ± 0,2 |     | AbS p=0,005        |
|                                                          | WAG/Rij-AGS | 2,3 ± 0,6 |     | (reduced by 46 %)  |
|                                                          | KM          | 2,7 ± 0,4 |     |                    |

| Table S2B. <i>INSULAR / LATERAL PREFRONTAL</i> |             |            |     |                                      |
|------------------------------------------------|-------------|------------|-----|--------------------------------------|
| D2DR, LEVEL 1                                  |             |            |     |                                      |
| REGION                                         | STRAIN      | MEAN       | SEM | main effect                          |
| GI                                             | Wistar      | 6,2 ± 0,6  |     |                                      |
|                                                | WAG/Rij     | 5,7 ± 0,5  |     |                                      |
|                                                | WAG/Rij-AGS | 5,7 ± 0,3  |     |                                      |
|                                                | KM          | 5,4 ± 0,7  |     |                                      |
| DI                                             | Wistar      | 9,2 ± 0,7  |     |                                      |
|                                                | WAG/Rij     | 7,8 ± 0,6  |     |                                      |
|                                                | WAG/Rij-AGS | 7,7 ± 0,4  |     |                                      |
|                                                | KM          | 10,2 ± 0,8 |     | "AUT" p=0,001<br>(increased by 29 %) |
| AID                                            | Wistar      | 6,5 ± 0,5  |     |                                      |
|                                                | WAG/Rij     | 6,3 ± 0,6  |     |                                      |
|                                                | WAG/Rij-AGS | 6,5 ± 0,4  |     |                                      |
|                                                | KM          | 7,2 ± 0,6  |     | "AUT" p=0,0<br>(increased by 18 %)   |
| AIV                                            | Wistar      | 5,2 ± 0,6  |     |                                      |
|                                                | WAG/Rij     | 5,8 ± 0,6  |     |                                      |
|                                                | WAG/Rij-AGS | 5,6 ± 0,3  |     |                                      |
|                                                | KM          | 6,1 ± 0,5  |     |                                      |
| CLAU                                           | Wistar      | 7,3 ± 0,6  |     |                                      |
|                                                | WAG/Rij     | 5,5 ± 0,6  |     | AbS p=0,005                          |
|                                                | WAG/Rij-AGS | 6,3 ± 0,4  |     | (reduced by 13%)                     |
|                                                | KM          | 7,4 ± 0,6  |     |                                      |
| PIR                                            | Wistar      | 5,6 ± 0,5  |     |                                      |
|                                                | WAG/Rij     | 6,3 ± 0,7  |     |                                      |
|                                                | WAG/Rij-AGS | 6,5 ± 0,6  |     |                                      |
|                                                | KM          | 5,3 ± 0,4  |     |                                      |

| Table S2C. ANTERIOR CINGULATE / MEDIAL PREFRONTAL |             |           |     |                    |
|---------------------------------------------------|-------------|-----------|-----|--------------------|
| D2DR, LEVEL 2                                     |             |           |     |                    |
| REGION                                            | STRAIN      | MEAN      | SEM | main effect        |
| A24b/Cg1                                          | Wistar      | 5,5 ± 0,7 |     |                    |
|                                                   | WAG/Rij     | 3,9 ± 0,4 |     | epilepsy p=0,01    |
|                                                   | WAG/Rij-AGS | 4,1 ± 0,3 |     | (decreased by 39%) |
|                                                   | KM          | 3,3 ± 0,3 |     |                    |
| A24a/Cg2                                          | Wistar      | 6,1 ± 0,7 |     |                    |
|                                                   | WAG/Rij     | 4,7 ± 0,3 |     | epilepsy p=0,02    |
|                                                   | WAG/Rij-AGS | 4,8 ± 0,3 |     | (decreased by 28%) |
|                                                   | KM          | 3,6 ± 0,2 |     |                    |

| Table S2D. INSULAR / LATERAL PREFRONTAL |             |           |     |                                      |
|-----------------------------------------|-------------|-----------|-----|--------------------------------------|
| D2DR, LEVEL 2                           |             |           |     |                                      |
| REGION                                  | STRAIN      | M         | SEM | main effect                          |
| GI                                      | Wistar      | 5,1 ± 0,7 |     |                                      |
|                                         | WAG/Rij     | 5,8 ± 0,5 |     |                                      |
|                                         | WAG/Rij-AGS | 6 ± 0,4   |     |                                      |
|                                         | KM          | 5,1 ± 0,2 |     |                                      |
| DI                                      | Wistar      | 7,2 ± 0,3 |     |                                      |
|                                         | WAG/Rij     | 7,2 ± 0,5 |     |                                      |
|                                         | WAG/Rij-AGS | 6,9 ± 0,4 |     |                                      |
|                                         | KM          | 7,8 ± 0,2 |     |                                      |
| AID                                     | Wistar      | 5,6 ± 0,4 |     |                                      |
|                                         | WAG/Rij     | 4,7 ± 0,4 |     |                                      |
|                                         | WAG/Rij-AGS | 5 ± 0,3   |     |                                      |
|                                         | KM          | 6,4 ± 0,4 |     | "AUT" p=0,002<br>(increased by 26 %) |
| AIV                                     | Wistar      | 5 ± 0,3   |     |                                      |
|                                         | WAG/Rij     | 5 ± 0,3   |     |                                      |
|                                         | WAG/Rij-AGS | 5,1 ± 0,4 |     |                                      |
|                                         | KM          | 5,4 ± 0,3 |     |                                      |
| CLAU                                    | Wistar      | 6 ± 0,7   |     |                                      |
|                                         | WAG/Rij     | 5 ± 0,4   |     |                                      |
|                                         | WAG/Rij-AGS | 5,5 ± 0,4 |     |                                      |
|                                         | KM          | 5,6 ± 0,4 |     |                                      |
| PIR                                     | Wistar      | 6,6 ± 0,3 |     |                                      |
|                                         | WAG/Rij     | 6,3 ± 0,5 |     |                                      |
|                                         | WAG/Rij-AGS | 6,6 ± 0,4 |     |                                      |
|                                         | KM          | 5,9 ± 0,5 |     |                                      |

**Table S2E. ANTERIOR CINGULATE / MEDIAL PREFRONTAL**  
**D2DR, LEVEL 3**

| REGION       | STRAIN      | MEAN | SEM   | main effect |
|--------------|-------------|------|-------|-------------|
| A24b'/mCing1 | Wistar      | 3    | ± 0,4 |             |
|              | WAG/Rij     | 1,9  | ± 0,5 |             |
|              | WAG/Rij-AGS | 1,6  | ± 0,3 |             |
|              | KM          | 1,8  | ± 0,2 |             |
| A24a'/mCing2 | Wistar      | 3    | ± 0,6 |             |
|              | WAG/Rij     | 1,7  | ± 0,4 |             |
|              | WAG/Rij-AGS | 1,4  | ± 0,3 |             |
|              | KM          | 2,4  | ± 0,2 |             |
| A33/area 33  | Wistar      | 3,7  | ± 0,7 |             |
|              | WAG/Rij     | 2,1  | ± 0,4 |             |
|              | WAG/Rij-AGS | 2,1  | ± 0,4 |             |
|              | KM          | 2,4  | ± 0,2 |             |

**Table S2F. INSULAR / LATERAL PREFRONTAL**  
**D2DR, LEVEL 3**

| REGION | STRAIN      | M   | SEM   | main effect |
|--------|-------------|-----|-------|-------------|
| GI     | Wistar      | 6,9 | ± 0,6 |             |
|        | WAG/Rij     | 6,5 | ± 0,6 |             |
|        | WAG/Rij-AGS | 6   | ± 0,5 |             |
|        | KM          | 5,9 | ± 0,5 |             |
| DI     | Wistar      | 7   | ± 0,7 |             |
|        | WAG/Rij     | 6,4 | ± 0,7 |             |
|        | WAG/Rij-AGS | 6   | ± 0,6 |             |
|        | KM          | 6,8 | ± 0,6 |             |
| AIP    | Wistar      | 5,9 | ± 0,6 |             |
|        | WAG/Rij     | 5,6 | ± 0,8 |             |
|        | WAG/Rij-AGS | 4,9 | ± 0,5 |             |
|        | KM          | 5,9 | ± 0,6 |             |

#### Tables S2A-F

D2 dopamine receptors' regional binding densities in the prefrontal cortical and adjacent regions in the rat groups studied  
S2A,S2B - anatomical level I (AP+2,4±2,5) ; S2C,S2D - anatomical level II (AP:+0,17±0,19); S2E,S2F -anatomical level III (AP:-0,26±0,33)

The values are given as mean ± SEM, in pmol/g of tissue.

The main effects (according to ANOVA GLM) and the corresponded p-levels (at the left) and the percentages of changes (below) are given

#### Abbreviations used:

**Cg1/A24b and Cg2/A24a: the primary and secondary cingulate cortex, correspondingly**

**mCing1/A24b' and mCing2/A24a' : the primary and secondary midcingulate cortex, correspondingly**

**IL, PL: the infra- and pre-limbic cortex, correspondingly**

**AID,AIV,AIP - the agranular insular cortex (dorsal, ventral and posterior divisions, correspondingly)**

**GI,DI: the granular and dysgranular insular cortex, correspondingly**

**CLAU: the claustrum**

**PIR: the piriform cortex**
